# Supplementary material for: Therapeutic Perspective of Vitamin C and Its Derivatives
Source: PubMed Central journal article supplement (PMC6721080; doi:10.3390/antiox8080247), 2019-07-26
Supplement: antioxidants-08-00247-s001.pdf [file antioxidants-08-00247-s001.pdf]

## Supplementary Information for:

Review

### Therapeutic Perspective of Vitamin C and Its Derivatives

Andrijana Mešćić Macan<sup>1,\*</sup>, Tatjana Gazivoda Kraljević<sup>1</sup> and Silvana Raić-Malić<sup>1</sup>

<sup>1</sup> 1 Department of Organic Chemistry, University of Zagreb, Faculty of Chemical Engineering and Technology, Marulićev trg 20, 10 000 Zagreb, Croatia

\* Correspondence: amescic@fkit.hr; Tel.: +385-1-4597203)

---

#### Contents:

---

Figures S1–S7

S1–S2

---

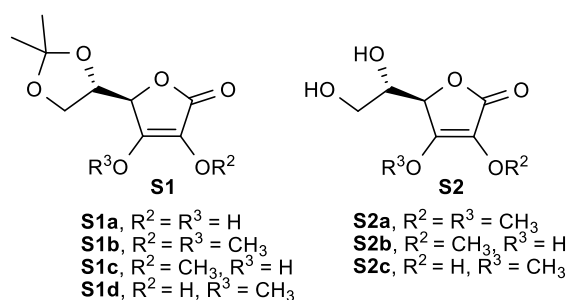

**Figure S1.** ASA derivatives with OH groups modified by alkyl groups.

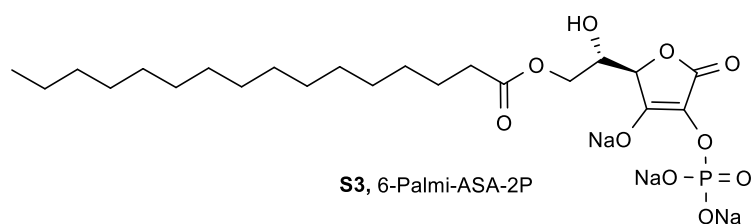

**Figure S2.** The 6-Palmi-ASA-2P as a ROS scavenger.

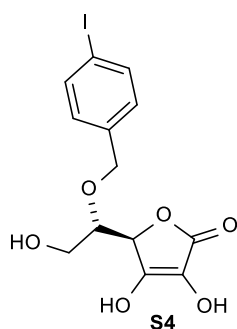

**Figure S3.** The 5-O-modified ASA derivative with a radical scavenging activity.

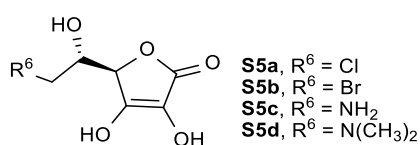

**Figure S4** The C-6 substituted ASA derivatives.

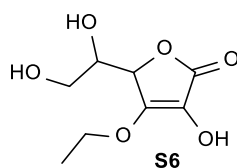

**Figure S5.** The structure of 3-O-ethylascorbic acid.

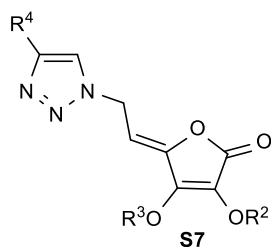

R<sup>2</sup> = R<sup>3</sup> = CH<sub>2</sub>Ph, CH<sub>3</sub>  
R<sup>4</sup> = alkyl, Ph, OH-alkyl, CH<sub>2</sub>-Ph, 4-alkyl-Ph,  
pyridine-2-yl, cyclohexenyl, cyclopropyl

**Figure S6.**  $\gamma$ -(Triazolylethylidene)butenolides.

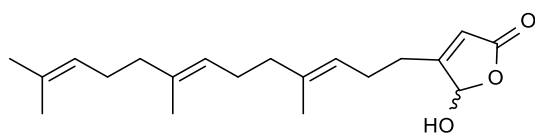

**Figure S7.** The butenolide diterpene isolated from the *Metaporana sericosepala*.
